1 Evaluation of the Roche SARS-CoV-2 Rapid Antibody Test in samples from  
2 vaccinated individuals

3

4 Johannes Hayer<sup>1</sup>

5 Eva Urlaub<sup>1</sup>

6

7 <sup>1</sup>Roche Diagnostics GmbH, Mannheim, Germany

8 Corresponding author: Eva Urlaub, Roche Diagnostics GmbH, Mannheim, Germany,

9 [eva.urlaub@roche.com](mailto:eva.urlaub@roche.com)

10

11 **Running title**

12 SARS-CoV-2 rapid POC antibody test in a vaccinated cohort

13

14

15 **Abstract**

16 *Objective*

17 The study aimed to establish the performance of the SARS-CoV-2 Rapid Antibody  
18 Test (IgG and IgM) and the Elecsys<sup>®</sup> Anti-SARS-CoV-2 S assay in vaccinated  
19 individuals.

20 *Methods*

21 A panel of serum samples from Boca Biostatics was utilized to assess antibodies  
22 following vaccination, consisting of samples drawn prior to vaccination, after the first  
23 dose, or at least 14 days after the second dose of Moderna mRNA-1273 or Pfizer-  
24 BioNTech BNT162b2 COVID-19 vaccines. Agreement between the two methods  
25 was measured and stratified by test evaluator and assay lot.

26 *Results*

27 Agreement between the SARS-CoV-2 Rapid Antibody Test (IgG) and Elecsys Anti-  
28 SARS-CoV-2 S assay qualitative measurements at the different assessment points  
29 for both mRNA-1273 and BNT162b2 ranged between 97.06% (95% confidence  
30 interval [CI] 84.67, 99.93) to 100% (95% CI 82.35, 100). Agreement of the SARS-  
31 CoV-2 Rapid Antibody Test (IgG) with the Elecsys Anti-SARS-CoV-2 S assay was  
32 not highly influenced by either lot or evaluator. There was a medium-to-strong  
33 correlation between the semi-quantitative SARS-CoV-2 Rapid Antibody Test (IgG)  
34 result and quantitative Elecsys Anti-SARS-CoV-2 S assay in samples taken after  
35 both doses of the vaccines, with higher intensity bands being associated with higher  
36 total anti-S antibody titer (mRNA-1273,  $p=0.0019$ ; BNT162b2,  $p<0.0001$ ).

37 *Conclusion*

38 Semi-quantitative SARS-CoV-2 Rapid Antibody Test (IgG) and quantitative Elecsys  
39 Anti-SARS-CoV-2 S assay correlated well, suggesting that the SARS-CoV-2 Rapid  
40 Antibody Test (IgG) is helpful in understanding the immune response post-  
41 vaccination. The current data support the use of the SARS-CoV-2 Rapid Antibody  
42 Test (IgG) in the vaccinated population.

### 43 **Importance**

44 Serologic assays are an essential tool for seroprevalence surveys, for quality control  
45 of vaccines, and to determine the response to vaccination. Although a correlate of  
46 immunity has not yet been established for COVID-19 vaccines, antibody titers after  
47 natural infection and vaccination have been associated with protection from  
48 symptomatic SARS-CoV-2 infection. Rapid point-of-care assays can be of use in this  
49 context with advantages over centralized testing, such as speed and ease of use.  
50 The point-of-care SARS-CoV-2 Rapid Antibody Test (IgG) compared favorably to the  
51 Elecsys Anti-SARS-CoV-2 S assay with agreement rates above 97.06%, after one or  
52 two doses of Moderna mRNA-1273 or Pfizer-BioNTech BNT162b2. Semi-  
53 quantitative SARS-CoV-2 Rapid Antibody Test (IgG) and quantitative Elecsys Anti-  
54 SARS-CoV-2 S assay results correlated well, suggesting that SARS-CoV-2 Rapid  
55 Antibody Test (IgG) is helpful in understanding the immune response post-  
56 vaccination. The current data support the use of the SARS-CoV-2 Rapid Antibody  
57 Test (IgG) in the vaccinated population.

### 58 **Keywords**

59 antibodies, neutralizing; COVID-19 vaccines; immunity; immunoassay; nucleocapsid  
60 protein; point-of-care systems; SARS-CoV-2; spike protein

61

## 62 **Introduction**

63 Serologic immunoassays are vital in the global management of the COVID-19  
64 pandemic. Measurement of antibodies to SARS-CoV-2 is important for improving  
65 disease management, and accurate tests, with validated sensitivity and specificity,  
66 are essential for obtaining reliable results when monitoring the pandemic via  
67 seroprevalence surveys (1). Serologic assays can provide evidence of recent or past  
68 infection (2), and identify those individuals still at risk of infection (3).

69 Infection with SARS-CoV-2 elicits a strong neutralizing antibody response (4), and  
70 antibodies that bind via the spike protein act as neutralizing antibodies (5, 6). Several  
71 studies have shown good correlation between anti-S antibodies and functional virus  
72 neutralization (7–11). Neutralization assays utilizing live virus require biosafety level  
73 3 containment, which can be labor intensive and low throughput (12–14); therefore  
74 anti-S immunoassays, as a surrogate for neutralization, have an important role to  
75 play (13, 15). On an individual patient level, anti-S immunoassays can confirm  
76 vaccination status or inform upon the need for booster doses (16), which may be  
77 helpful for both social and medical reasons.

78 Moderna mRNA-1273 (spikevax™) and Pfizer-BioNTech BNT162b2 (COMIRNATY®)  
79 COVID-19 vaccines are mRNA vaccines, approved under the U.S. Food and Drug  
80 Administration's emergency use authorization, each employing a two-dose regimen  
81 (17, 18). The immune response involves B cells that produce binding and  
82 neutralizing antibodies against the SARS-CoV-2 S protein (19, 20) and both  
83 vaccines encode the SARS-CoV-2 spike protein to generate an immune response.  
84 Serologic assays are an essential tool in vaccine quality control, being used to  
85 determine the response to vaccination and providing insight into the antibody  
86 response from the individual patient perspective (21, 22).

87 The Elecsys<sup>®</sup> Anti-SARS-CoV-2 S assay (Roche Diagnostics International Ltd,  
88 Rotkreuz, Switzerland) is an electrochemiluminescence immunoassay (ECLIA),  
89 which has been developed for quantitative *in vitro* detection of antibodies in human  
90 serum and plasma (23). The assay detects total antibodies, including  
91 immunoglobulin G (IgG), against the receptor binding domain (RBD) of the SARS-  
92 CoV-2 spike protein, and is intended for use on the fully automated and high-  
93 throughput cobas e analyzers (23). The assay has been shown to detect anti-S  
94 antibodies across a variety of different populations (2, 24), and has been utilized as a  
95 surrogate of neutralization activity (11, 25).

96 The SARS-CoV-2 Rapid Antibody Test (Roche Diagnostics International Ltd,  
97 Rotkreuz, Switzerland) is CE-marked rapid chromatographic immunoassay intended  
98 for the qualitative *in vitro* detection of both IgM and IgG antibodies to SARS-CoV-2  
99 spike or nucleocapsid proteins in human serum, plasma or whole blood, for  
100 professional use in the laboratory and at point-of-care (26). A study utilizing real-  
101 world clinical samples in unvaccinated individuals demonstrated that the SARS-CoV-  
102 2 Rapid Antibody Test had comparable performance with the Elecsys Anti-SARS-  
103 CoV-2 assay that targets the nucleocapsid protein (27).

104 The objective of this study was to establish the performance of the SARS-CoV-2  
105 Rapid Antibody Test and the Elecsys Anti-SARS-CoV-2 S assay in serum samples  
106 obtained from individuals who had received a COVID-19 vaccination.

## 107 **Materials and Methods**

### 108 *Study design*

109 The study was a retrospective performance study conducted at Roche Diagnostics  
110 GmbH (Mannheim, Germany). All samples were analyzed with the SARS-CoV-2

111 Rapid Antibody Test and compared with the Elecsys Anti-SARS-CoV-2 S assay.

112 Tests were conducted as per manufacturer's instructions (23).

### 113 *Samples*

114 To assess antibodies following vaccination, a post-vaccination panel was prepared  
115 using 74 serum samples obtained from Boca Biolistics (Florida, USA), collected  
116 between February and April 2021, and stored at -20°C or colder (all available  
117 samples at the time of request). Serum samples were from individuals from the USA  
118 sampled prior to vaccination, after the first dose, or at least 14 days after the second  
119 dose of Moderna mRNA-1273 or Pfizer-BioNTech BNT162b2 (Supplemental Table  
120 1).

121 Samples were separated into aliquots of 50 µL for the SARS-CoV-2 Rapid Antibody  
122 Test measurement and 200 µL for the Elecsys Anti-SARS-CoV-2 S reference  
123 measurement on the cobas<sup>®</sup> 6000 and stored at -80°C until use.

124 An in-house panel of 15 negative serum samples, previously determined negative by  
125 Elecsys Anti-SARS-CoV-2 S assay, was utilized to assess the specificity of the  
126 SARS-CoV-2 Rapid Antibody Test. Samples were collected in June 2021 as part of  
127 an in-house blood donation service at Roche Diagnostics (Mannheim, Germany),  
128 anonymized, and stored at -80°C until use. No information about vaccination status  
129 was available. Evaluators were blinded as to the origin of the samples. Cross-  
130 reactivity to other pathogens was not analyzed in this study as this has been  
131 evaluated elsewhere (26, 27).

### 132 *SARS-CoV-2 Rapid Antibody Test*

133 The SARS-CoV-2 Rapid Antibody Test detects the presence of SARS-CoV-2 IgM  
134 and IgG antibodies, and the intensity of the test line is dependent upon the level of

135 SARS-CoV-2 antibodies present in the sample (26). In unvaccinated individuals, the  
136 reported sensitivity is 92.59% (7–14 days post-symptom onset [POS]) and 99.03%  
137 (>14 days POS), with specificity of 98.65% (26).

138 Each sample was tested with two different lots of the SARS-CoV-2 Rapid Antibody  
139 Test. The readout was visually assessed at 10 minutes by two different independent  
140 evaluators; these evaluators were not the operators who had performed the test. In  
141 accordance with manufacturer's instructions, the sample was considered positive if  
142 the control line and at least one colored band/test line at G or M became apparent  
143 (qualitative determination). As an exploratory analysis, results were further defined  
144 by the intensity of the band to provide semi-quantitative data (Supplemental Table  
145 2), with the signal intensity being rated according to a color scale. Data are  
146 presented separated by lot and by evaluator. In the event of an invalid result, the test  
147 would be repeated.

#### 148 *Elecsys Anti-SARS-CoV-2 S assay*

149 The Elecsys Anti-SARS-CoV-2 S assay results are reported automatically as the  
150 analyte concentration of each sample in U/mL, with <0.80 U/mL interpreted as  
151 negative and  $\geq 0.80$  U/mL interpreted as positive for anti-SARS-CoV-2 S antibodies  
152 (23). The reported sensitivity and specificity of this test 14 days post-PCR is 97.92%  
153 and 99.95%, respectively (24). The quantification range is between 0.4 and 250  
154 U/mL and the reported limit of detection is 0.35 U/mL (23). If the sample  
155 concentration is >250 U/mL, the sample can be diluted up to 1:100; in these cases,  
156 the final result is determined as >25,000 U/mL (23).

157 In the event of an invalid result, the test would be repeated. All samples were  
158 measured in duplicate, and the result calculated as the arithmetic mean of both

159 replicates. Assessors were blinded to the SARS-CoV-2 Rapid Antibody Test results  
160 and blinded as to the origin of the samples.

### 161 *Statistical analysis*

162 The agreement rates comparing the SARS-CoV-2 Rapid Antibody Test with Elecsys  
163 Anti-SARS-CoV-2 S assay per vaccine type were calculated per lot. Two-sided 95%  
164 Clopper–Pearson confidence intervals (CI) for the agreement rates are given.

165 Correlation between the semi-quantitative SARS-CoV-2 Rapid Antibody Test data  
166 and quantitative Elecsys Anti-SARS-CoV-2 S assay data was assessed using the  
167 Kendall's rank correlation  $\tau$ . Accuracy of the SARS-CoV-2 Rapid Antibody Test result  
168 — how often do the qualitative results agree with one another — was assessed by  
169 lot and evaluator. Statistical analyses were conducted using R (version 3.6.3) and  
170 JMP (version 15).

### 171 **Results**

172 Overall, the study cohort consisted of 56 predominantly white/Caucasian individuals  
173 (median age 70 years; 55.36% female) with a variety of pre-existing medical  
174 conditions (Table 1). No invalid results were generated using either test.

### 175 *Analyses of the SARS-CoV-2 Rapid Antibody Test (qualitative) with the Elecsys Anti-* 176 *SARS-CoV-2 S assay (quantitative and qualitative)*

177 Eight samples were obtained from patients who were sampled prior to vaccination.  
178 Whilst only two patients were reported to have been previously diagnosed with  
179 COVID-19, only one patient was IgG and IgM negative (by both the SARS-CoV-2  
180 Rapid Antibody Test and Elecsys Anti-SARS-CoV-2 S assay). For the seven positive  
181 samples, Elecsys Anti-SARS-CoV-2 S total antibody titers ranged from 254.0 U/mL



182 to >25,000 U/mL and all were identified as positive by the SARS-CoV-2 Rapid  
183 Antibody Test.

184 The post-vaccination antibody analysis included 25 samples from individuals  
185 vaccinated with mRNA-1273 and 42 vaccinated with BNT162b2. The dosing interval  
186 between first and second vaccine doses for BNT162b2 was a median of 21 days  
187 (minimum 19 days, maximum 23 days) and a median of 28 days (minimum 21 days,  
188 maximum 32 days) for mRNA-1273. There was good agreement between the SARS-  
189 CoV-2 Rapid Antibody Test (IgG) and Elecsys Anti-SARS-CoV-2 S qualitative  
190 measurements at the different assessment points for both the Moderna and Pfizer-  
191 BioNTech vaccines ranging from 97.06% (95% CI 84.67, 99.93) to 100% (95% CI  
192 89.72, 100) (Table 2). There was one false-negative sample with evaluator 2 (after  
193 second dose of BNT162b2, lot 1 and lot 2), however this sample was classified as  
194 positive by evaluator 1.

195 There was poor agreement between the SARS-CoV-2 Rapid Antibody Test (IgM)  
196 and Elecsys Anti-SARS-CoV-2 S assay qualitative measurements at the different  
197 assessment points for both BNT162b2 and mRNA-1273 ranging from 14.71% (95%  
198 CI 4.95, 31.06) to 80.00% (95% CI 28.36, 99.49) with many false-negatives (Table  
199 2).

200 Using the in-house negative panel, there were no false-positive results for either lot  
201 or evaluator (**Error! Reference source not found.**).

202 *Analyses of the SARS-CoV-2 Rapid Antibody Test (semi-quantitative) with the*  
203 *Elecsys Anti-SARS-CoV-2 S assay (quantitative)*

204 There was a medium-to-strong correlation between the semi-quantitative SARS-  
205 CoV-2 Rapid Antibody Test (IgG) and quantitative Elecsys Anti-SARS-CoV-2 S

206 assay in samples taken after both doses of the vaccines (Figure 1), with higher  
207 intensity bands being associated with higher total anti-S antibody titer (with Kendall's  
208  $\tau$  up to 0.599 for IgG mRNA-1273 [ $p=0.0019$ ] and 0.6833 [ $p<0.0001$ ] for IgG  
209 BNT162b2) (**Error! Reference source not found.**). There was no correlation  
210 between the quantitative Elecsys Anti-SARS-CoV-2 S assay result and the intensity  
211 of the SARS-CoV-2 Rapid Antibody Test (IgM) (**Error! Reference source not  
212 found.**).

213 Agreement between the semi-quantitative SARS-CoV-2 Rapid Antibody Test (IgM)  
214 and quantitative Elecsys Anti-SARS-CoV-2 S assay was poor, with many samples  
215 designated as negative on the SARS-CoV-2 Rapid Antibody Test (IgM) even in the  
216 presence of high anti-S antibody titers (Results from the SARS-CoV-2 Rapid  
217 Antibody Test were classified as negative or one of the five levels of increasing  
218 positivity based upon line intensity (((+)), (+), +, ++ or +++). Maximum value  
219 attainable by the Elecsys Anti-SARS-CoV-2 assay was 25,000 U/mL. Higher values  
220 are indicated as >25,000 U/mL. Blue = Lot 1; red = Lot 2; ○ = Evaluator 1; + =  
221 Evaluator 2.

222

223 Figure 2).

#### 224 *Accuracy of the SARS-CoV-2 Rapid Antibody Test*

225 Comparison of the SARS-CoV-2 Rapid Antibody Test (IgG) results by lot or  
226 evaluator revealed that these factors did not influence the results, with a minimum  
227 accuracy estimate of 97.06% (**Error! Reference source not found.**).

228 SARS-CoV-2 Rapid Antibody Test (IgM) positivity appeared to be influenced by  
229 evaluator, with a minimum accuracy estimate of 40% and considerable variability in  
230 accuracy estimates across the different time points and vaccines (**Error! Reference  
231 source not found.**).

#### 232 *Evaluation of Elecsys Anti-SARS-CoV-2 S assay titer post-vaccination*

233 Antibody titers by days following final vaccination are shown in Figure 3. Following  
234 complete vaccination with BNT162b2 or mRNA-1273 and up to approximately 20  
235 days, there was significant variability with both high (maximum >25,000 U/mL) and  
236 low (minimum 238.2 U/mL for BNT162b2 and 340.2 U/mL for mRNA-1273) anti-S  
237 titers. After 30 days, anti-S titers for both vaccines commonly declined to below  
238 5,000 U/mL (overall minimum 13.53 U/mL 25 days after vaccination with BNT162b2).

239 The median time between final vaccination and final measurement for those  
240 vaccinated with BNT162b2 was 18 days (minimum 14 days, maximum 44 days) and  
241 46 days (minimum 14 days, maximum 65 days) for mRNA-1273. Anti-S antibody  
242 titers were numerically higher in participants vaccinated mRNA-1273 (median 2,307  
243 U/mL; interquartile range [IQR] 872–6,845) than in those who received BNT162b2  
244 (median 1,601 U/mL; IQR 467–3,131).

#### 245 *Longitudinal analysis*

246 A small number of individuals had samples available from all three time points  
247 (BNT162b2 cohort), allowing longitudinal evaluation of anti-S antibody titer levels; all  
248 except one showed high levels of anti-S antibody titers at the first time point (prior to  
249 vaccination). There was considerable variance in the effect of vaccination upon anti-  
250 S antibody titers, however the greatest change was for the individual who was  
251 infection-naïve (<0.4 U/mL to 1,645 U/mL following the second dose). For five out of  
252 eight individuals, including those with previously diagnosed COVID-19, anti-S  
253 antibody titers decreased over time despite vaccination with BNT162b2 (**Error!**  
254 **Reference source not found.**).

## 255 Discussion

256 Serologic assays are an essential tool for quality control of vaccines and to  
257 determine the response to vaccination. Although a correlate of immunity has not yet  
258 been established for COVID-19 vaccines, antibody titers after natural infection and  
259 vaccination have been associated with protection from symptomatic SARS-CoV-2  
260 infection (28); and rapid point-of-care assays can potentially be of use in this setting  
261 with particular advantages over centralized testing, such as speed and ease of use.

262 We evaluated the use of the SARS-CoV-2 Rapid Antibody Test in vaccinated  
263 individuals in comparison with the Elecsys Anti-SARS-CoV-2 S assay.

264 Our results indicate that the Elecsys Anti-SARS-CoV-2 S assay detects anti-S  
265 antibodies after the first dose of both BNT162b2 and mRNA-1273, in agreement with  
266 previous studies of the adaptive humoral response to vaccination in various  
267 populations (21, 22, 29–33).

268 Whilst the performance of rapid antibody tests has been reported in unvaccinated  
269 individuals (34–36), no studies have yet reported upon their use in vaccinated

270 individuals. The SARS-CoV-2 Rapid Antibody Test (IgG) compared favorably to the  
271 Elecsys Anti-SARS-CoV-2 S assay with agreement rates above 97.06%, after one  
272 dose and two doses, similar to what has been observed in unvaccinated individuals  
273 (27). Assessment of the influence of lot or evaluator revealed that agreement of the  
274 SARS-CoV-2 Rapid Antibody Test (IgG) with the Elecsys Anti-SARS-CoV-2 S assay  
275 was not highly influenced by either factor, suggesting that the SARS-CoV-2 Rapid  
276 Antibody Test (IgG) is robust under normal usage conditions.

277 There was low agreement of the SARS-CoV-2 Rapid Antibody Test (IgM) with the  
278 Elecsys Anti-SARS-CoV-2 S assay because, in general, there is a lower sensitivity  
279 for IgM compared with IgG for point-of-care lateral flow assays, as exemplified in a  
280 recent analysis of healthcare workers vaccinated with the first dose of the Pfizer  
281 vaccine and sampled 21–24 days thereafter (37). In addition, the Elecsys Anti-  
282 SARS-CoV-2 S assay preferentially detects high-affinity IgG antibodies that compete  
283 with IgM antibodies (23), contributing to the lower agreement rates with IgM results.  
284 In agreement with previous research on the use of lateral flow assays in  
285 unvaccinated individuals (38, 39), we also report lower evaluator concordance when  
286 reading IgM compared with IgG bands. Jones and colleagues found that IgM bands  
287 are often weak positives (39), consistent with our data in vaccinated individuals,  
288 potentially resulting in an increased likelihood of a miscall and contributing to the low  
289 reader agreement.

290 The vaccines were administered in accordance with the relevant primary dosing  
291 schedules, with approximately 3 weeks for BNT162b2 and 1 month for mRNA-1273  
292 between doses (17, 18). Whilst the data reported herein suggest some variation in  
293 the level of antibody titers afforded by the vaccines, two doses of either mRNA-1273  
294 or BNT162b2 induced high levels of anti-S antibodies. Anti-S total antibody titers

295 were higher in participants vaccinated with mRNA-1273 than BNT162b2, in  
296 accordance with previous publications (40). Whilst the clinical significance of  
297 quantitative differences in antibody titers following COVID-19 vaccination have not  
298 yet been established, understanding the differences in antibody titer can support  
299 individual choices and assist with policy decisions.

300 The longitudinal analysis revealed that five individuals in the BNT162b2 cohort  
301 appeared to have previously undiagnosed SARS-CoV-2 infection prior to  
302 vaccination, and the effect of vaccination upon anti-S antibody titers in this group at  
303 the individual level was highly variable (relative decrease or increase after the first  
304 dose). Overall, after primary vaccination with two doses, all except one of those with  
305 previous natural infection had higher anti-S antibody titers than the infection-naïve  
306 participant, in agreement with previous reports which support higher titers following  
307 vaccination in previously infected individuals (40–42).

308 The findings of this study are subject to several limitations. The performance of the  
309 SARS-CoV-2 Rapid Antibody Test in vaccinated individuals was based on the  
310 evaluation of a relatively small panel of samples and utilized only two vaccines.  
311 However, the cohort tested was generally representative of an aged US population,  
312 with hypertension and diabetes mellitus in line with age-related expectations of  
313 prevalence (43, 44). Whilst the median anti-S antibody titers induced by vaccination  
314 differed between those vaccinated with BNT162b2 or mRNA-1273, the majority of  
315 the post-vaccination BNT162b2 samples were collected earlier than samples  
316 collected for mRNA-1273, there were more data points for BNT162b2, and the data  
317 for mRNA-1273 samples spanned a longer time frame (last sample was post 60  
318 days for mRNA-1273 compared with <45 days for BNT162b2). Furthermore, most of

319 the samples used in the longitudinal analysis were from positive pre-vaccinated  
320 individuals, which limits our findings.

321 The clinical relevance of semi-quantitative results is currently unknown and, at  
322 present, cannot be interpreted as an indication of varying levels of immunity. In  
323 addition, semi-quantitative evaluation of the intensity of the bands is determined by  
324 the reader and therefore subjective, even with the use of a color scale guide and  
325 training. The performance of the SARS-CoV-2 Rapid Antibody Test seen herein can  
326 also not be extrapolated to immunocompromised individuals whose immune  
327 response post vaccination may be more variable (45). However, semi-quantitative  
328 SARS-CoV-2 Rapid Antibody Test (IgG) and quantitative Elecsys Anti-SARS-CoV-2  
329 S assay results correlated well, suggesting that SARS-CoV-2 Rapid Antibody Test  
330 (IgG) is helpful in understanding the immune response post vaccination, particularly  
331 in the absence of centralized and fully automated testing systems. The current data  
332 support the use of the SARS-CoV-2 Rapid Antibody Test (IgG) in the vaccinated  
333 population.

### 334 **Conflicts of interest**

335 All authors have completed the ICMJE uniform disclosure form at  
336 [www.icmje.org/coi\\_disclosure.pdf](http://www.icmje.org/coi_disclosure.pdf) and declare: that JH and EU are employees of  
337 Roche Diagnostics; EU participates in Roche Connect; no other relationships or  
338 activities that could appear to have influenced the submitted work.

### 339 **Ethical approval and consent**

340 Anonymized samples were provided by the commercial supplier Boca Biologics and  
341 collected under their ethical approval system. Ethical approval for the in-house panel  
342 was provided by Ethik-Kommission II der Universität Heidelberg, Medizinische

343 Fakultät, Mannheim, Germany. Samples were anonymized, and collected and tested  
344 in accordance with applicable regulations, including relevant European Union  
345 directives and regulations, and the principles of the Declaration of Helsinki.

346 **Data availability**

347 Data available upon request. For more information on the study and data sharing,  
348 qualified researchers may contact the corresponding author, Eva Urlaub  
349 [eva.urlaub@roche.com](mailto:eva.urlaub@roche.com).

350



351 **Funding**

352 Roche Diagnostics GmbH (Mannheim, Germany) provided financial support for the  
353 study and for preparation of the article. Roche Diagnostics GmbH was involved in  
354 the study design; in the collection, analysis and interpretation of data; in the writing of  
355 the report; and in the decision to submit the article for publication. Medical writing  
356 support was funded by Roche Diagnostics GmbH.

357 **Acknowledgements**

358 Medical writing support was provided by Corrinne Segal, Elements Communications  
359 Ltd, Westerham, UK. The authors would like to thank Rabea Held, Regina Draude,  
360 Maureen Adamietz, Shervan Horo, and Jlenia Marconi of Roche Diagnostics for their  
361 contribution to the study. COBAS, COBAS E, and ELECSYS are trademarks of  
362 Roche. All other product names and trademarks are the property of their respective  
363 owners'. The specific application (use in vaccinated individuals) is currently outside  
364 of the intended use of the SARS-CoV-2 Rapid Antibody Test. The Elecsys Anti-  
365 SARS-CoV-2 S assay is approved under an Emergency Use Authorization in the US.

366

367

## 368 **References**

- 369 1. Krammer F, Simon V. 2020. Serology assays to manage COVID-19. *Science*  
370 368:1060–1061.
- 371 2. Riester E, Majchrzak M, Mühlbacher A, Tinguely C, Findeisen P, Hegel JK,  
372 Laimighofer M, Rank CM, Schönfeld K, Langen F, Laengin T, Niederhauser C.  
373 2021. Multicentre performance evaluation of the Elecsys Anti-SARS-CoV-2  
374 immunoassay as an aid in determining previous exposure to SARS-CoV-2. *Infect*  
375 *Dis Ther* doi:10.1007/s40121-021-00504-9:1–17.
- 376 3. Alter G, Seder R. 2020. The power of antibody-based surveillance. *N Engl J Med*  
377 383:1782–1784.
- 378 4. Lau EHY, Tsang OTY, Hui DSC, Kwan MYW, Chan WH, Chiu SS, Ko RLW,  
379 Chan KH, Cheng SMS, Perera R, Cowling BJ, Poon LLM, Peiris M. 2021.  
380 Neutralizing antibody titres in SARS-CoV-2 infections. *Nat Commun* 12:63.
- 381 5. Yang J, Petitjean SJL, Koehler M, Zhang Q, Dumitru AC, Chen W, Derclaye S,  
382 Vincent SP, Soumillion P, Alsteens D. 2020. Molecular interaction and inhibition  
383 of SARS-CoV-2 binding to the ACE2 receptor. *Nat Commun* 11:4541.
- 384 6. Yan R, Zhang Y, Li Y, Xia L, Guo Y, Zhou Q. 2020. Structural basis for the  
385 recognition of SARS-CoV-2 by full-length human ACE2. *Science* 367:1444–1448.
- 386 7. Bal A, Pozzetto B, Traubad MA, Escuret V, Rabilloud M, Langlois-Jacques C,  
387 Paul A, Guibert N, D'Aubarède-Frieh C, Massardier-Pilonchery A, Fabien N,  
388 Goncalves D, Boibieux A, Morfin-Sherpa F, Pitiot V, Gueyffier F, Lina B, Fassier  
389 JB, Trouillet-Assant S. 2021. Evaluation of high-throughput SARS-CoV-2

390 serological assays in a longitudinal cohort of patients with mild COVID-19: clinical  
391 sensitivity, specificity, and association with virus neutralization test. *Clin Chem*  
392 67:742–752.

393 8. Bonelli F, Sarasini A, Zierold C, Calleri M, Bonetti A, Vismara C, Blocki FA,  
394 Pallavicini L, Chinali A, Campisi D, Percivalle E, DiNapoli AP, Perno CF, Baldanti  
395 F. 2020. Clinical and analytical performance of an automated serological test that  
396 identifies S1/S2-neutralizing IgG in COVID-19 patients semiquantitatively. *J Clin*  
397 *Microbiol* 58:e01224–20.

398 9. Muecksch F, Wise H, Batchelor B, Squires M, Semple E, Richardson C, McGuire  
399 J, Clearly S, Furrrie E, Greig N, Hay G, Templeton K, Lorenzi JCC, Hatzioannou  
400 T, Jenks S, Bieniasz PD. 2021. Longitudinal serological analysis and neutralizing  
401 antibody levels in coronavirus disease 2019 convalescent patients. *J Infect Dis*  
402 223:389–398.

403 10. Weidner L, Gänsdorfer S, Unterweger S, Weseslindtner L, Drexler C, Farcet M,  
404 Witt V, Schistal E, Schlenke P, Kreil TR, Jungbauer C. 2020. Quantification of  
405 SARS-CoV-2 antibodies with eight commercially available immunoassays. *J Clin*  
406 *Virol* 129:104540.

407 11. Rubio-Acero R, Castelletti N, Fingerle V, Olbrich L, Bakuli A, Wölfel R, Girl P,  
408 Müller K, Jochum S, Strobl M, Hoelscher M, Wieser A. 2021. In search of the  
409 SARS-CoV-2 protection correlate: Head-to-head comparison of two quantitative  
410 S1 assays in pre-characterized oligo-/asymptomatic patients. *Infect Dis Ther*  
411 10:1505–1518.

- 412 12. Nie J, Li Q, Wu J, Zhao C, Hao H, Liu H, Zhang L, Nie L, Qin H, Wang M, Lu Q,  
413 Li X, Sun Q, Liu J, Fan C, Huang W, Xu M, Wang Y. 2020. Establishment and  
414 validation of a pseudovirus neutralization assay for SARS-CoV-2. *Emerg*  
415 *Microbes Infect* 9:680–686.
- 416 13. Oguntuyo KY, Stevens CS, Hung CT, Ikegame S, Acklin JA, Kowdle SS,  
417 Carmichael JC, Chiu HP, Azarm KD, Haas GD, Amanat F, Klingler J, Baine I,  
418 Arinsburg S, Bandres JC, Siddiquey MNA, Schilke RM, Woolard MD, Zhang H,  
419 Duty AJ, Kraus TA, Moran TM, Tortorella D, Lim JK, Gamarnik AV, Hioe CE,  
420 Zolla-Pazner S, Ivanov SS, Kamil JP, Krammer F, Lee B. 2021. Quantifying  
421 absolute neutralization titers against SARS-CoV-2 by standardized virus  
422 neutralization assay allows for cross-cohort comparisons of COVID-19 sera.  
423 *mBio* 12:e02492–20.
- 424 14. Vanderheiden A, Edara VV, Floyd K, Kauffman RC, Mantus G, Anderson E,  
425 Rouphael N, Edupuganti S, Shi PY, Menachery VD, Wrammert J, Suthar MS.  
426 2020. Development of a rapid focus reduction neutralization test assay for  
427 measuring SARS-CoV-2 neutralizing antibodies. *Curr Protoc Immunol* 131:e116.
- 428 15. Jochum S, Kirste I, Hortsch S, Grunert VP, Legault H, Eichenlaub U, Kashlan B,  
429 Pajon R. 2021. Clinical utility of Elecsys Anti-SARS-CoV-2 S assay in COVID-19  
430 vaccination: An exploratory analysis of the mRNA-1273 phase 1 trial. *medRxiv*  
431 doi:10.1101/2021.10.04.21264521:2021.10.04.21264521.
- 432 16. Baldanti F, Ganguly N, Wang G, Möckel M, O'Neill L, Renz H, Eduardo dos  
433 Santos Ferreira C, Tateda K, Van Der Pol B. 2021. Deployment of SARS-CoV-2

- 434 diagnostic testing: challenges and key considerations for the future. Clin Rev Lab  
435 Sci [submitted].
- 436 17. Pfizer-BioNTech. 2021. Fact sheet for healthcare providers administering  
437 vaccine (vaccination providers): emergency use authorization (EUA) of the  
438 Pfizer-BioNTech COVID-19 vaccine to prevent coronavirus disease 2019  
439 (COVID-19). <https://www.fda.gov/media/153713/download>. Accessed 26 Nov  
440 2021.
- 441 18. Moderna TX. 2021. Fact sheet for healthcare providers administering vaccine  
442 (vaccination providers): emergency use authorization (EUA) of the moderna  
443 COVID-19 vaccine to prevent coronavirus disease 2019 (COVID-19).  
444 <https://www.fda.gov/media/144637/download>. Accessed 26 Nov 2021.
- 445 19. Widge AT, Rouphael NG, Jackson LA, Anderson EJ, Roberts PC, Makhene M,  
446 Chappell JD, Denison MR, Stevens LJ, Pruijssers AJ, McDermott AB, Flach B,  
447 Lin BC, Doria-Rose NA, O'Dell S, Schmidt SD, Neuzil KM, Bennett H, Leav B,  
448 Makowski M, Albert J, Cross K, Edara VV, Floyd K, Suthar MS, Buchanan W,  
449 Luke CJ, Ledgerwood JE, Mascola JR, Graham BS, Beigel JH. 2021. Durability  
450 of responses after SARS-CoV-2 mRNA-1273 vaccination. N Engl J Med 384:80–  
451 82.
- 452 20. Mrak D, Tobudic S, Koblichke M, Graninger M, Radner H, Sieghart D, Hofer P,  
453 Perkmann T, Haslacher H, Thalhammer R, Winkler S, Blüml S, Stiasny K, Aberle  
454 JH, Smolen JS, Heinz LX, Aletaha D, Bonelli M. 2021. SARS-CoV-2 vaccination  
455 in rituximab-treated patients: B cells promote humoral immune responses in the  
456 presence of T-cell-mediated immunity. Ann Rheum Dis 80:1345–1350.

- 457 21. Lukaszuk K, Kiewisz J, Rozanska K, Dabrowska M, Podolak A, Jakiel G,  
458 Woclawek-Potocka I, Lukaszuk A, Rabalski L. 2021. Usefulness of IVD kits for  
459 the assessment of SARS-CoV-2 antibodies to evaluate the humoral response to  
460 vaccination. *Vaccines* 9:840.
- 461 22. Salvagno GL, Henry BM, di Piazza G, Pighi L, De Nitto S, Bragantini D,  
462 Gianfilippi GL, Lippi G. 2021. Anti-SARS-CoV-2 receptor-binding domain total  
463 antibodies response in seropositive and seronegative healthcare workers  
464 undergoing COVID-19 mRNA BNT162b2 Vaccination. *Diagnostics* 11:832.
- 465 23. Roche Diagnostics. 2021. Elecsys® Anti-SARS-CoV-2 S, instructions for use  
466 (09289275190, V3.0, Dec 2021).
- 467 24. Riester E, Findeisen P, Hegel JK, Kabesch M, Ambrosch A, Rank CM, Pessl F,  
468 Laengin T, Niederhauser C. 2021. Performance evaluation of the Roche Elecsys  
469 Anti-SARS-CoV-2 S immunoassay. *J Virol Methods* 297:114271.
- 470 25. Resman Rus K, Korva M, Knap N, Avšič Županc T, Poljak M. 2021. Performance  
471 of the rapid high-throughput automated electrochemiluminescence immunoassay  
472 targeting total antibodies to the SARS-CoV-2 spike protein receptor binding  
473 domain in comparison to the neutralization assay. *J Clin Virol* 139:104820.
- 474 26. Roche Diagnostics/SD BioSensor. 2020. SARS-CoV-2 Rapid Antibody Test,  
475 instructions for use (9901-NCOV-02C, V2.0, Sept 2020).
- 476 27. Findeisen P, Stiegler H, Lopez-Calle E, Schneider T, Urlaub E, Hayer J,  
477 Zemmrich C. 2021. Clinical performance evaluation of a SARS-CoV-2 Rapid

- 478           Antibody Test for determining past exposure to SARS-CoV-2. *Int J Infect Dis*  
479           103:636–641.
- 480   28.   Khoury DS, Cromer D, Reynaldi A, Schlub TE, Wheatley AK, Juno JA, Subbarao  
481           K, Kent SJ, Triccas JA, Davenport MP. 2021. Neutralizing antibody levels are  
482           highly predictive of immune protection from symptomatic SARS-CoV-2 infection.  
483           *Nat Med* 27:1205–1211.
- 484   29.   Kennedy NA, Lin S, Goodhand JR, Chanchlani N, Hamilton B, Bewshea C, Nice  
485           R, Chee D, Cummings JF, Fraser A, Irving PM, Kamperidis N, Kok KB, Lamb  
486           CA, Macdonald J, Mehta S, Pollok RC, Raine T, Smith PJ, Verma AM, Jochum  
487           S, McDonald TJ, Sebastian S, Lees CW, Powell N, Ahmad T. 2021. Infliximab is  
488           associated with attenuated immunogenicity to BNT162b2 and ChAdOx1 nCoV-  
489           19 SARS-CoV-2 vaccines in patients with IBD. *Gut* 70:1884–1893.
- 490   30.   Callegaro A, Borleri D, Farina C, Napolitano G, Valenti D, Rizzi M, Maggiolo F.  
491           2021. Antibody response to SARS-CoV-2 vaccination is extremely vivacious in  
492           subjects with previous SARS-CoV-2 infection. *J Med Virol* 93:4612–4615.
- 493   31.   Cavalcanti E, Isgrò MA, Rea D, Di Capua L, Trillò G, Russo L, Botti G, Miscio L,  
494           Buonaguro FM, Bianchi AAM. 2021. Vaccination strategy and anti - SARS-CoV-  
495           2 S titers in healthcare workers of the INT - IRCCS "Fondazione Pascale"  
496           Cancer Center (Naples, Italy). *Infect Agent Cancer* 16:32.
- 497   32.   Herishanu Y, Avivi I, Aharon A, Shefer G, Levi S, Bronstein Y, Morales M, Ziv T,  
498           Shorer Arbel Y, Scarfò L, Joffe E, Perry C, Ghia P. 2021. Efficacy of the

- 499 BNT162b2 mRNA COVID-19 vaccine in patients with chronic lymphocytic  
500 leukemia. *Blood* 137:3165–3173.
- 501 33. Seyahi E, Bakhdiyarli G, Oztas M, Kuskucu MA, Tok Y, Sut N, Ozcifci G,  
502 Ozcaglayan A, Balkan, II, Saltoglu N, Tabak F, Hamuryudan V. 2021. Antibody  
503 response to inactivated COVID-19 vaccine (CoronaVac) in immune-mediated  
504 diseases: a controlled study among hospital workers and elderly. *Rheumatol Int*  
505 41:1429–1440.
- 506 34. Batra R, Olivieri LG, Rubin D, Vallari A, Pearce S, Olivo A, Prostko J, Nebbia G,  
507 Douthwaite S, Rodgers M, Cloherty G. 2020. A comparative evaluation between  
508 the Abbott Panbio™ COVID-19 IgG/IgM rapid test device and Abbott Architect™  
509 SARS CoV-2 IgG assay. *J Clin Virol* 132:104645.
- 510 35. Naranbhai V, Chang CC, Beltran WFG, Miller TE, Astudillo MG, Villalba JA, Yang  
511 D, Gelfand J, Bernstein BE, Feldman J, Hauser BM, Caradonna TM, Alter G,  
512 Murali MR, Jasrasaria R, Quinlan J, Xerras DC, Betancourt JR, Louis DN,  
513 Schmidt AG, Lennerz J, Poznansky MC, Iafrate AJ. 2020. High seroprevalence  
514 of anti-SARS-CoV-2 antibodies in Chelsea, Massachusetts. *J Infect Dis*  
515 222:1955–1959.
- 516 36. Pallett SJC, Rayment M, Patel A, Fitzgerald-Smith SAM, Denny SJ, Charani E,  
517 Mai AL, Gilmour KC, Hatcher J, Scott C, Randell P, Mughal N, Jones R, Moore  
518 LSP, Davies GW. 2020. Point-of-care serological assays for delayed SARS-CoV-  
519 2 case identification among health-care workers in the UK: A prospective  
520 multicentre cohort study. *Lancet Respir Med* 8:885–894.



- 521 37. Saluzzo F, Mantegani P, Poletti De Chaurand V, Quaresima V, Cugnata F, Di  
522 Serio C, Macé A, De Vos M, Sacks JA, Cirillo DM. 2021. SARS-CoV-2 Antibody  
523 Rapid Tests: Valuable Epidemiological Tools in Challenging Settings. *Microbiol*  
524 *Spectr* 9:e0025021.
- 525 38. Whitman JD, Hiatt J, Mowery CT, Shy BR, Yu R, Yamamoto TN, Rathore U,  
526 Goldgof GM, Whitty C, Woo JM, Gallman AE, Miller TE, Levine AG, Nguyen DN,  
527 Bapat S P, Balcersek J, Bylsma SA, Lyons AM, Li S, Wong AW, Gillis-Buck EM,  
528 Steinhart ZB, Lee Y, Apathy R, Lipke MJ, Smith JA, Zheng T, Boothby IC, Isaza  
529 E, Chan J, Acenas DD 2<sup>nd</sup>, Lee J, Macrae TA, Kyaw TS, Wu D, Ng DL, Gu W,  
530 York VA, Eskandarian HA, Callaway PC, Warriar L, Moreno ME, Levan J, Torres  
531 L, Farrington LA, Loudermilk RP, Koshal K, Zorn KC, Garcia-Beltran WF, Yang  
532 D, Astudillo MG, Bernstein BE, Gelfand JA, Ryan ET, Charles RC, Iafrate AJ,  
533 Lennerz JK, Miller S, Chiu CY, Stramer SL, Wilson MR, Manglik A, Ye CJ,  
534 Krogan NJ, Anderson MS, Cyster JG, Ernst JD, Wu AHB, Lynch KL, Bern C, Hsu  
535 PD, Marson A. 2020. Evaluation of SARS-CoV-2 serology assays reveals a  
536 range of test performance. *Nat Biotechnol* 38: 1174–1183.
- 537 39. Jones HE, Mulchandani R, Taylor-Phillips S, Ades AE, Shute J, Perry KR,  
538 Chandra NL, Brooks T, Charlett A, Hickman M, Oliver I, Kaptoge S, Danesh J, Di  
539 Angelantonio E, Wyllie D. Accuracy of four lateral flow immunoassays for anti  
540 SARS-CoV-2 antibodies: a head-to-head comparative study. 2021. *EBioMedicine*  
541 68: 103414.
- 542

- 543 40. Steensels D, Pierlet N, Penders J, Mesotten D, Heylen L. 2021. Comparison of  
544 SARS-CoV-2 antibody response following vaccination with BNT162b2 and  
545 mRNA-1273. *JAMA* 326:1533–1535.
- 546 41. Di Meo A, Miller JJ, Fabros A, Brinc D, Hall V, Pinzon N, Ierullo M, Ku T, Ferreira  
547 VH, Kumar D, Pasic MD, Kulasingam V. 2021. Evaluation of three anti-SARS-  
548 CoV-2 serologic immunoassays for post-vaccine response. *J Appl Lab Med* Aug  
549 3:jfab087.
- 550 42. Terpos E, Trougakos IP, Karalis V, Ntanasis-Stathopoulos I, Gumeni S,  
551 Apostolakou F, Sklirou AD, Gavriatopoulou M, Skourti S, Kastritis E, Korompoki  
552 E, Papassotiriou I, Dimopoulos MA. 2021. Kinetics of anti-SARS-CoV-2 antibody  
553 responses 3 months post complete vaccination with BNT162b2; A prospective  
554 study in 283 health workers. *Cells* 10:1942.
- 555 43. Centers for Disease Control and Prevention. 2020. National diabetes statistic  
556 report, 2020. [https://www.cdc.gov/diabetes/pdfs/data/statistics/national-diabetes-](https://www.cdc.gov/diabetes/pdfs/data/statistics/national-diabetes-statistics-report.pdf)  
557 [statistics-report.pdf](https://www.cdc.gov/diabetes/pdfs/data/statistics/national-diabetes-statistics-report.pdf). Accessed 24 Nov 2021.
- 558 44. Ostchega R, Fyar C, Nwanko T, Nguyen D. 2020. Hypertension prevalence  
559 among adults aged 18 and over: United States, 2017–2018. *NCHS Data Brief*  
560 364:1–8.
- 561 45. Lee A, Wong SY, Chai LYA, Lee SC, Lee MX, Muthiah MD, Tay SH, Teo CB,  
562 Tan BKJ, Chan YH, Sundar R, Soon YY. 2022. Efficacy of covid-19 vaccines in  
563 immunocompromised patients: systematic review and meta-analysis. *BMJ*  
564 376:e068632.

565 **Tables and figures for ms**

566 Table 1: Demographics of the donors from the Boca Biolistics panel

567

| <b>Characteristics</b>                      | <b>All<br/>N=56</b> | <b>Pfizer<br/>n=34</b> | <b>Moderna<br/>n=22</b> |
|---------------------------------------------|---------------------|------------------------|-------------------------|
| <b>Male/female, %</b>                       | 44.64/55.36         | 44.12/55.88            | 45.45/54.55             |
| <b>Median age, IQR</b>                      | 70 (61.75–72)       | 70 (63–71.75)          | 71 (57.25–73)           |
| <b>Ethnicity, %</b>                         |                     |                        |                         |
| Asian; Not Hispanic/Latino,                 | 1.79                | 2.94                   | 0                       |
| Black/African American; Not Hispanic/Latino | 3.57                | 5.88                   | 0                       |
| White/Caucasian; Not Hispanic/Latino        | 64.29               | 61.76                  | 68.18                   |
| Hispanic/Latino; Black/African American     | 7.14                | 8.82                   | 4.55                    |
| Hispanic/Latino; White/Caucasian            | 23.21               | 20.59                  | 27.27                   |
| <b>Pre-existing medical conditions, %</b>   |                     |                        |                         |
| Yes/No                                      | 51.79/48.21         | 50.00/50.00            | 54.55/45.45             |
| Hypertension, Yes/No                        | 60.71/39.29         | 35.29/64.71            | 54.55/45.45             |

|                           |            |             |       |
|---------------------------|------------|-------------|-------|
| Diabetes mellitus, Yes/No | 7.14/92.86 | 11.76/88.24 | 0/100 |
|---------------------------|------------|-------------|-------|

568 IQR, interquartile range

569 Table 2: Agreement between SARS-CoV-2 Rapid Antibody Test (IgG and IgM) and Elecsys Anti-SARS-CoV-2 S assay (reference  
 570 test) qualitative measurements as measured by lot and evaluator using the Boca Biolistics donor panel, and after one dose or at  
 571 least 14 days after two doses of Moderna mRNA-1273 or Pfizer-BioNTech BNT162b2

572

|             |               | mRNA-1273   |       |             |       |             |       |             |       | BNT162b2    |       |             |       |             |       |             |       |
|-------------|---------------|-------------|-------|-------------|-------|-------------|-------|-------------|-------|-------------|-------|-------------|-------|-------------|-------|-------------|-------|
|             |               | 1 dose      |       |             |       | 2 doses     |       |             |       | 1 dose      |       |             |       | 2 doses     |       |             |       |
|             |               | Evaluator 1 |       | Evaluator 2 |       | Evaluator 1 |       | Evaluator 2 |       | Evaluator 1 |       | Evaluator 2 |       | Evaluator 1 |       | Evaluator 2 |       |
|             |               | Lot 1       | Lot 2 | Lot 1       | Lot 2 | Lot 1       | Lot 2 | Lot 1       | Lot 2 | Lot 1       | Lot 2 | Lot 1       | Lot 2 | Lot 1       | Lot 2 | Lot 1       | Lot 2 |
| <b>Ig G</b> | <b>N</b>      | 5           | 5     | 5           | 5     | 19          | 19    | 19          | 19    | 8           | 8     | 8           | 8     | 34          | 34    | 34          | 34    |
|             | <b>N +</b>    | 5           | 5     | 5           | 5     | 19          | 19    | 19          | 19    | 7           | 7     | 7           | 7     | 34          | 34    | 34          | 34    |
|             | <b>N -</b>    | -           | -     | -           | -     | -           | -     | -           | -     | 1*          | 1*    | 1*          | 1*    | -           | -     | -           | -     |
|             | <b>TP</b>     | 5           | 5     | 5           | 5     | 19          | 19    | 19          | 19    | 7           | 7     | 7           | 7     | 34          | 34    | 33          | 33    |
|             | <b>FN</b>     | 0           | 0     | 0           | 0     | 0           | 0     | 0           | 0     | 0           | 0     | 0           | 0     | 0           | 0     | 1           | 1     |
|             | <b>PPA, %</b> | 100         | 100   | 100         | 100   | 100         | 100   | 100         | 100   | 100         | 100   | 100         | 100   | 100         | 100   | 97.0        | 97.0  |
|             | <b>lower</b>  | 47.82       | 47.82 | 47.82       | 47.82 | 82.3        | 82.3  | 82.3        | 82.3  | 59.0        | 59.0  | 59.0        | 59.0  | 89.7        | 89.7  | 84.6        | 84.6  |

|             |                 |       |       |       |       |       |       |       |       |       |       |       |       |       |       |       |       |
|-------------|-----------------|-------|-------|-------|-------|-------|-------|-------|-------|-------|-------|-------|-------|-------|-------|-------|-------|
|             | <b>CI</b>       |       |       |       |       |       |       |       |       |       |       |       |       |       |       |       |       |
|             | <b>upper CI</b> | 100   | 100   | 100   | 100   | 100   | 100   | 100   | 100   | 100   | 100   | 100   | 100   | 100   | 100   | 99.93 | 99.93 |
| <b>Ig M</b> | <b>N</b>        | 5     | 5     | 5     | 5     | 19    | 19    | 19    | 19    | 8     | 8     | 8     | 8     | 34    | 34    | 34    | 34    |
|             | <b>N +</b>      | 5     | 5     | 5     | 5     | 19    | 19    | 19    | 19    | 7     | 7     | 7     | 7     | 34    | 34    | 34    | 34    |
|             | <b>N -</b>      | -     | -     | -     | -     | -     | -     | -     | -     | 1*    | 1*    | 1*    | 1*    | -     | -     | -     | -     |
|             | <b>TP</b>       | 1     | 1     | 4     | 3     | 4     | 4     | 6     | 4     | 2     | 2     | 3     | 2     | 6     | 6     | 5     | 5     |
|             | <b>FN</b>       | 4     | 4     | 1     | 2     | 15    | 15    | 13    | 15    | 5     | 5     | 4     | 5     | 28    | 28    | 29    | 29    |
|             | <b>PPA, %</b>   | 20.00 | 20.00 | 80.00 | 60.00 | 21.05 | 21.05 | 31.58 | 21.05 | 28.57 | 28.57 | 42.86 | 28.57 | 17.65 | 17.65 | 14.71 | 14.71 |
|             | <b>lower CI</b> | 0.51  | 0.51  | 28.36 | 14.66 | 6.05  | 6.05  | 12.58 | 6.05  | 3.67  | 3.67  | 9.9   | 3.67  | 6.76  | 6.76  | 4.95  | 4.95  |
|             | <b>upper CI</b> | 71.64 | 71.64 | 99.49 | 94.73 | 45.57 | 45.57 | 56.55 | 45.57 | 70.96 | 70.96 | 81.59 | 70.96 | 34.53 | 34.53 | 31.06 | 31.06 |

573 \*1 sample was detected as antibody-negative by the Elecsys Anti-SARS-CoV-2 S and the SARS-CoV-2 Rapid Antibody Test.

574 +, positive by the reference test (Elecsys Anti-SARS-CoV-2 S assay); -, negative by the reference test (Elecsys Anti-SARS-CoV-2

575 S assay); CI, 95% confidence intervals; TP, true-positive; FN, false-negative; PPA, positive percent agreement

576 Figure 1: SARS-CoV-2 Rapid Antibody Test semi-quantitative IgG vs Elecsys Anti-  
577 SARS-CoV-2 S assay total antibody titer following vaccination with Moderna mRNA-  
578 1273 (left panel) or Pfizer-BioNTech BNT162b2 (right panel) at least 14 days  
579 following second dose

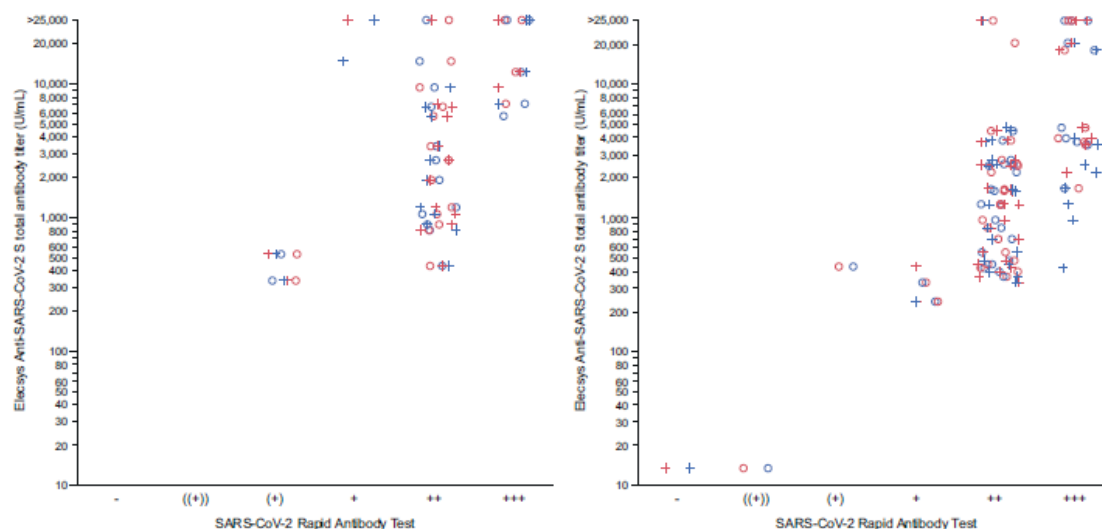

580  
581

582 Results from the SARS-CoV-2 Rapid Antibody Test were classified as negative or  
583 one of the five levels of increasing positivity based upon line intensity (((+)), (+), +,  
584 ++ or +++). Maximum value attainable by the Elecsys Anti-SARS-CoV-2 assay was  
585 25,000 U/mL. Higher values are indicated as >25,000 U/mL. Blue = Lot 1; red = Lot  
586 2; ○ = Evaluator 1; + = Evaluator 2.

587

588 Figure 2: SARS-CoV-2 Rapid Antibody Test semi-quantitative IgM vs Elecsys Anti-  
589 SARS-CoV-2 S assay total antibody titer following vaccination with Moderna mRNA-  
590 1273 (left panel) or Pfizer-BioNTech BNT162b2 (right panel) at least 14 days  
591 following second dose

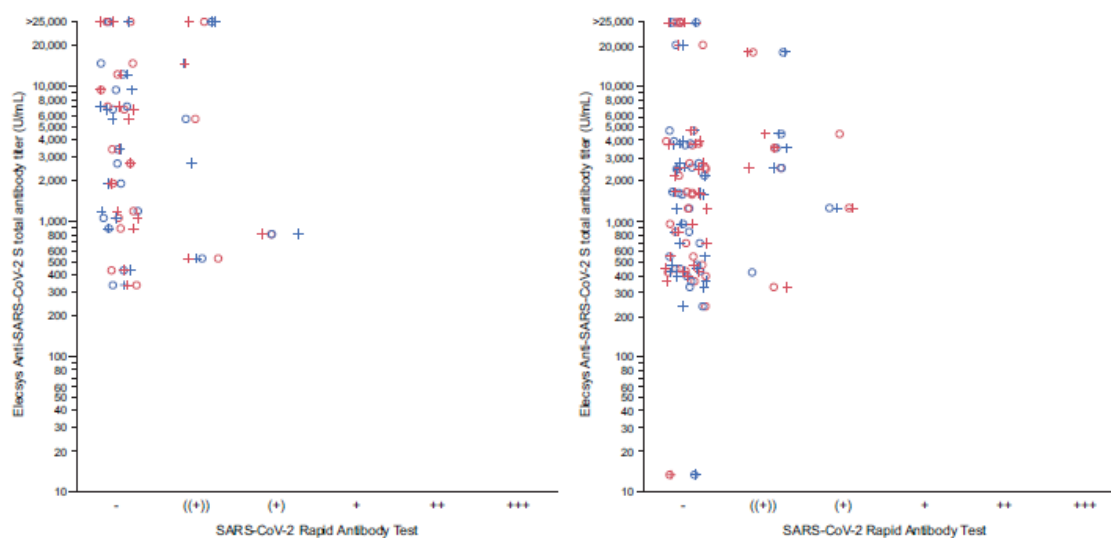

592  
593 Results from the SARS-CoV-2 Rapid Antibody Test were classified as negative or  
594 one of the five levels of increasing positivity based upon line intensity (((+)), (+), +,  
595 ++ or +++). Maximum value attainable by the Elecsys Anti-SARS-CoV-2 assay was  
596 25,000 U/mL. Higher values are indicated as >25,000 U/mL. Blue = Lot 1; red = Lot  
597 2; ○ = Evaluator 1; + = Evaluator 2.

598



599 Figure 3: Elecsys Anti-SARS-CoV-2 S assay total antibody titer over time following  
600 vaccination with Moderna mRNA-1273 or Pfizer-BioNTech BNT162b2 (second dose)

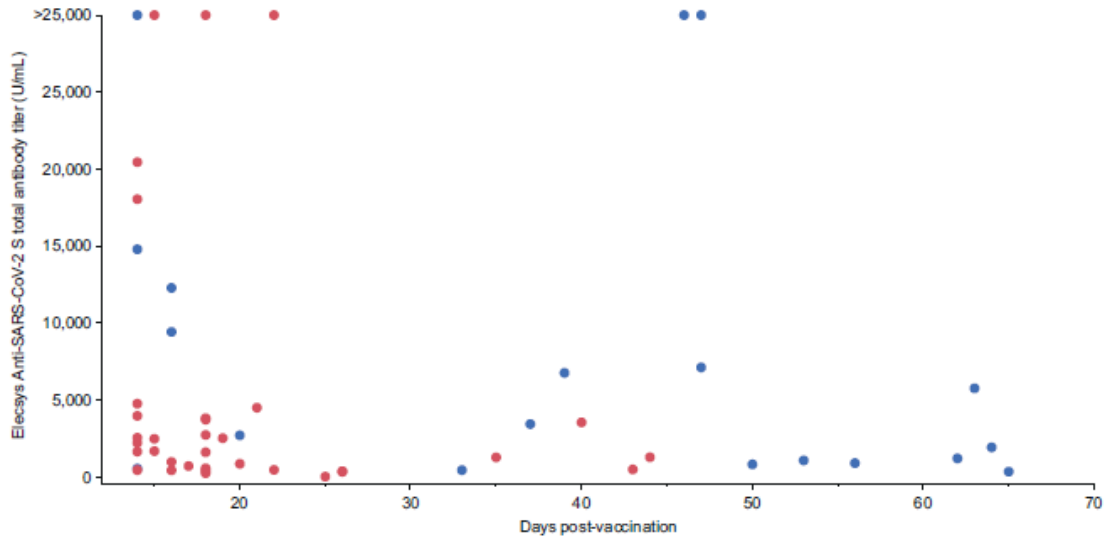

601

602 Maximum value attainable by the Elecsys Anti-SARS-CoV-2 assay was 25,000

603 U/mL. Higher values are indicated as >25,000 U/mL. Blue = mRNA-1273; red =

604 BNT162b2

605
